# Supplementary material
Source: PubMed Central journal article supplement (PMC5497501)
Supplement: NIHMS837242-supplement-1.pdf [file NIHMS837242-supplement-1.pdf]

# A

1  
Grow biofilm  
without motile cells

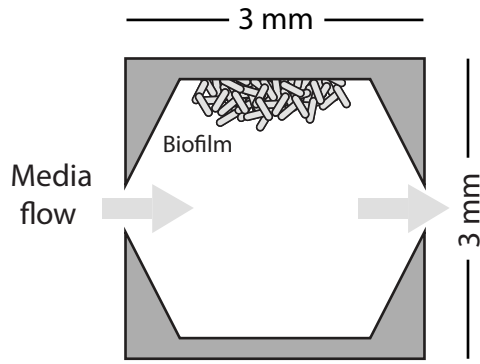

2  
Introduce  
motile cells

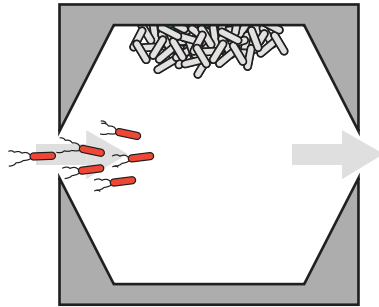

3  
Motile cell  
attraction phase

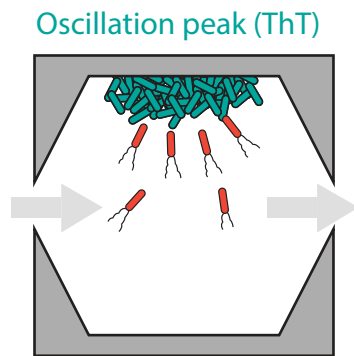

4  
Motile cell  
relaxation phase

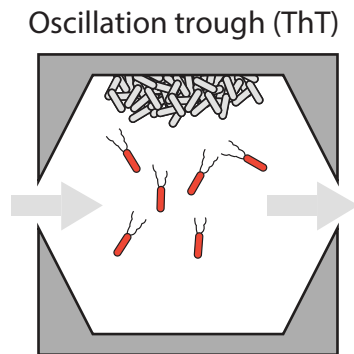

Figure S1: Humphries et al.
