# Supplementary material
Source: PubMed Central journal article supplement (PMC5497501)

**A**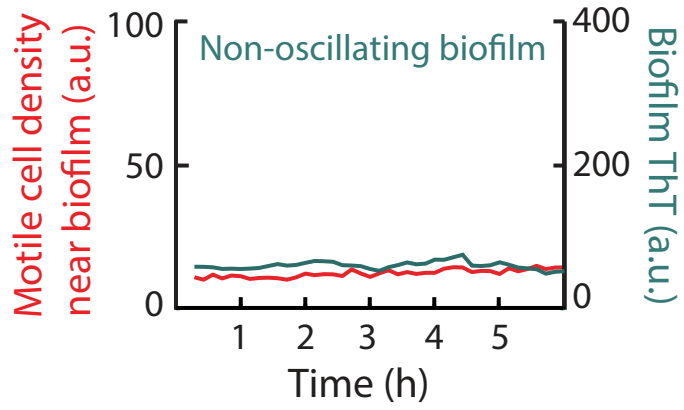**B**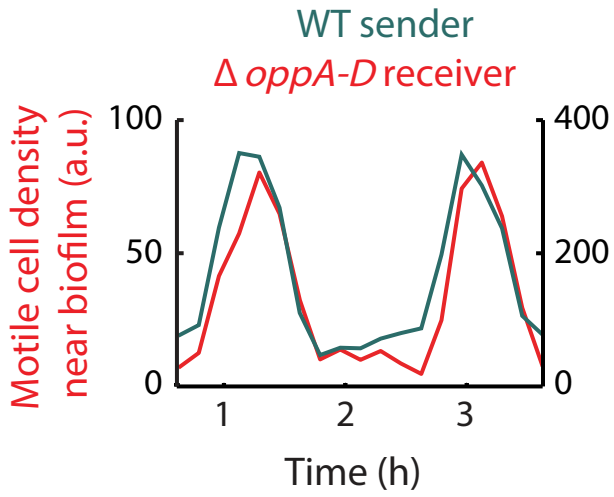**C**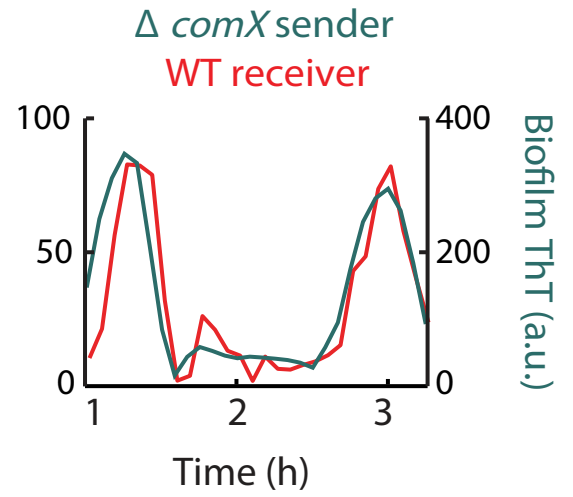

Figure S2: Humphries et al.

Supplement: NIHMS837242-supplement-2.pdf [file NIHMS837242-supplement-2.pdf]

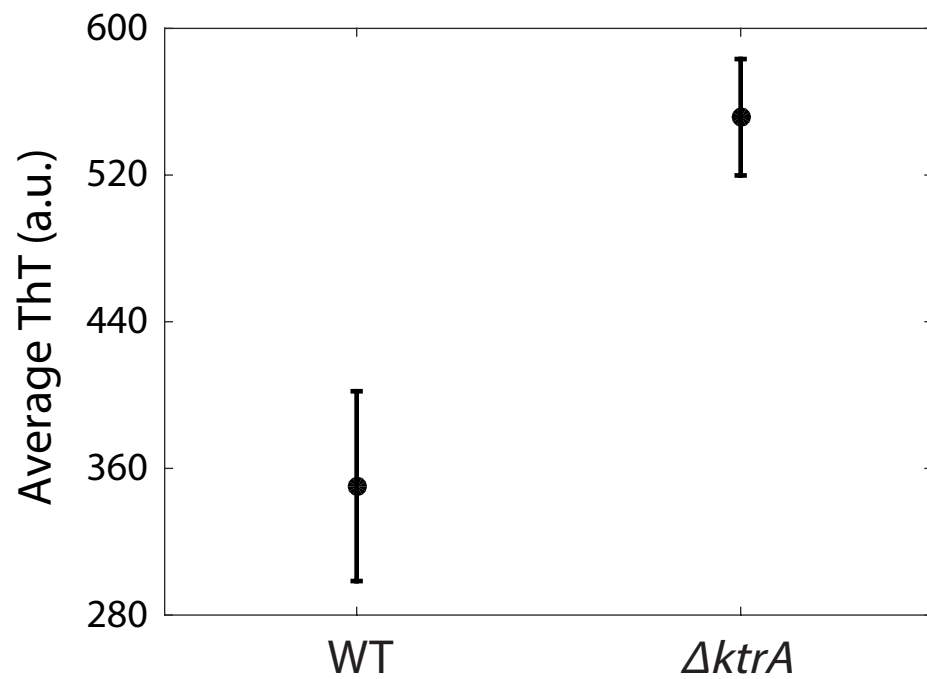

Figure S3: Humphries et al.

Supplement: NIHMS837242-supplement-3.pdf [file NIHMS837242-supplement-3.pdf]

**A**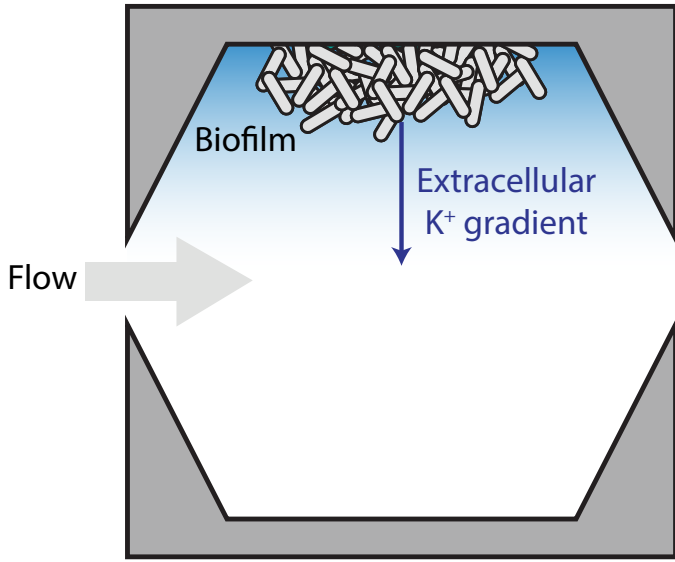**B**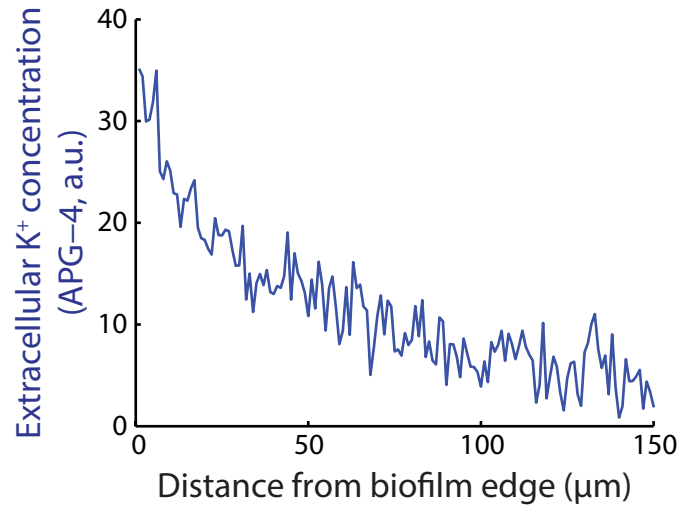

Figure S4: Humphries et al.

Supplement: NIHMS837242-supplement-4.pdf [file NIHMS837242-supplement-4.pdf]
